# Supplementary material for: Synthesis of an imine-type nickel complex and investigation of its electrocatalytic activity for H2 evolution
Source: Royal Society of Chemistry journal article supplement (doi:10.1039/d4ra08116a), 2025-01-01
Supplement: d4ra08116a1.pdf [file d4ra08116a1.pdf]

## Supporting Information

### **Synthesis of an Imine-type Nickel complex and investigation of its electrocatalytic activity for H<sub>2</sub> evolution**

Lan H. Le;<sup>a</sup> Ngoc H. Pham;<sup>a</sup> Phong D. Tran;<sup>a</sup> Tung H. To<sup>\*a</sup>

<sup>a</sup> *University of Science and Technology of Hanoi, Vietnam Academy of Science and Technology*

*18 Hoang Quoc Viet, Hanoi, Vietnam*

\*Corresponding author: [to-hai.tung@usth.edu.vn](mailto:to-hai.tung@usth.edu.vn)

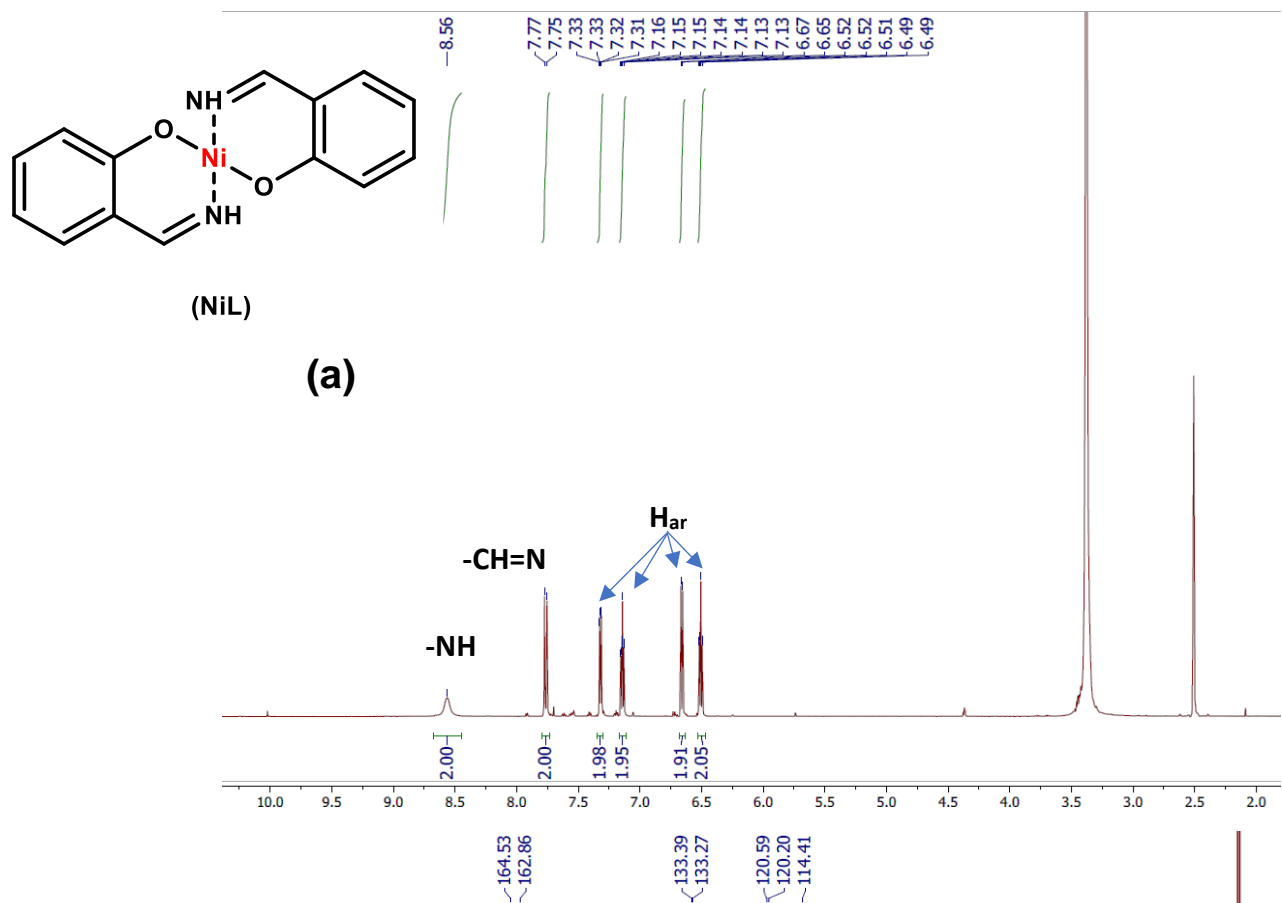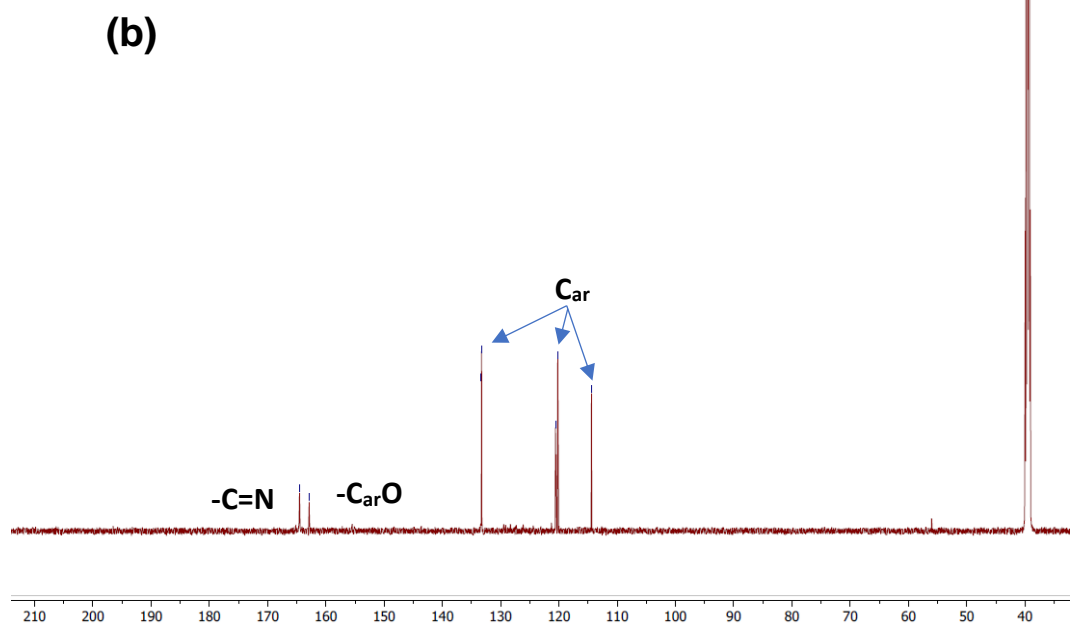

Fig. S1 <sup>1</sup>H-NMR (a) and <sup>13</sup>C-NMR (b) spectra of complex NiL

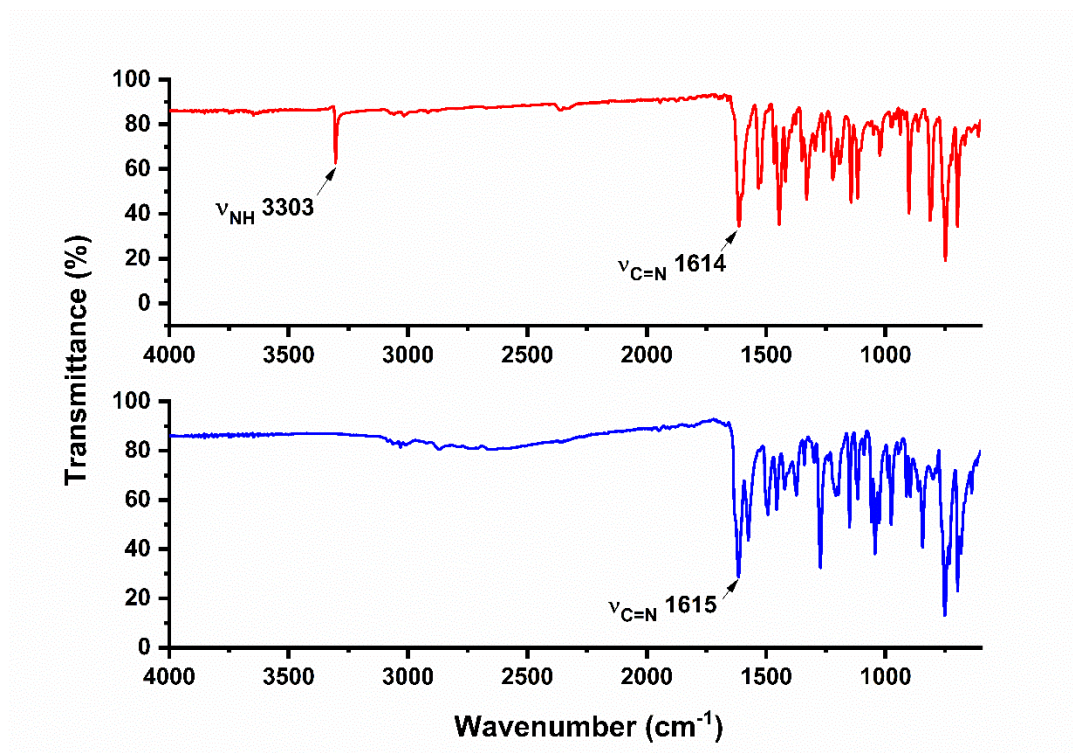

Fig. S2 FT-IR spectrum of complex **NiL** (red line) and pre ligand **M** (blue line)

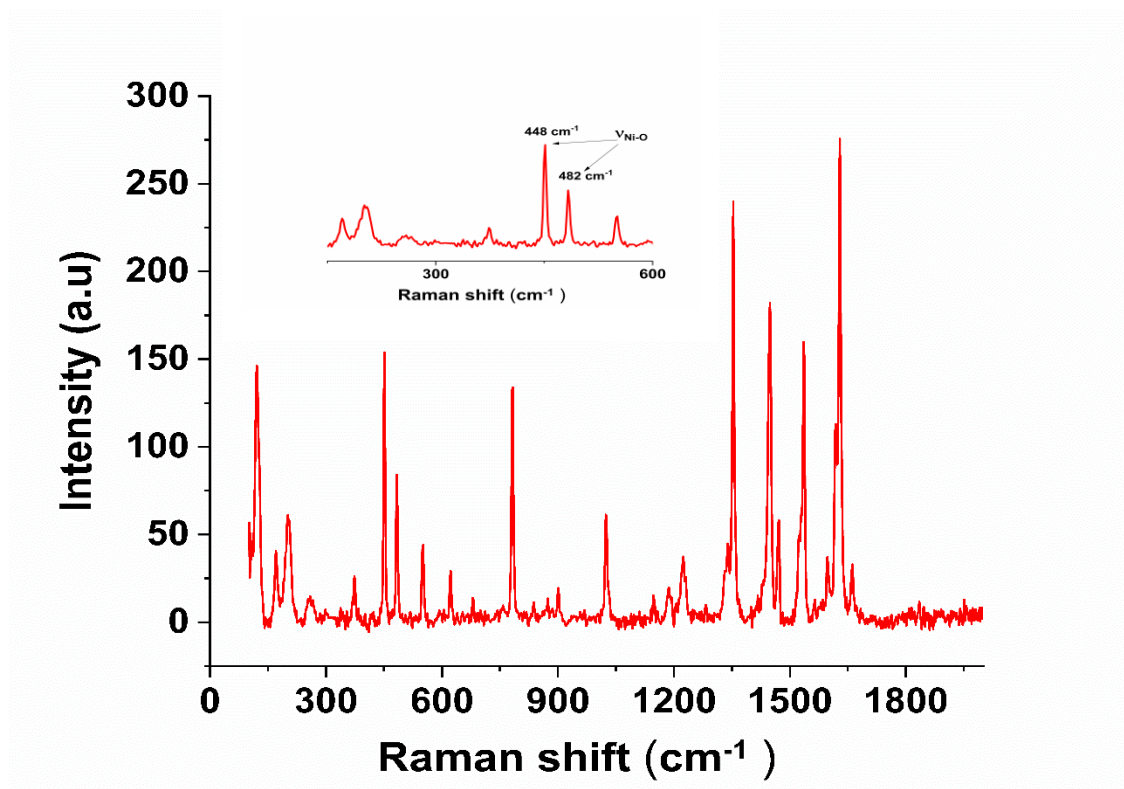

Fig. S3 Raman spectrum of complex **NiL**

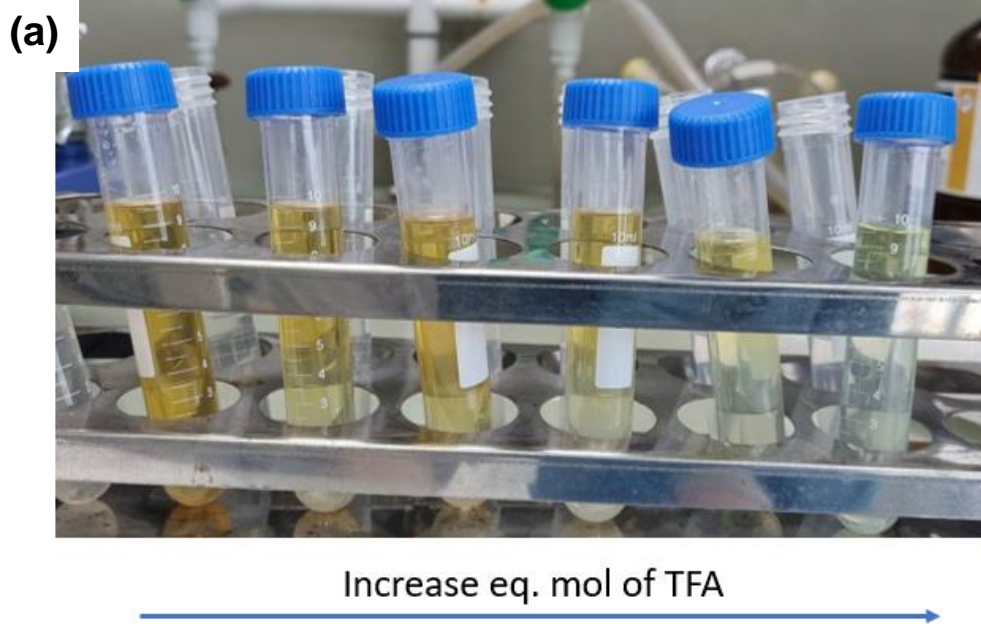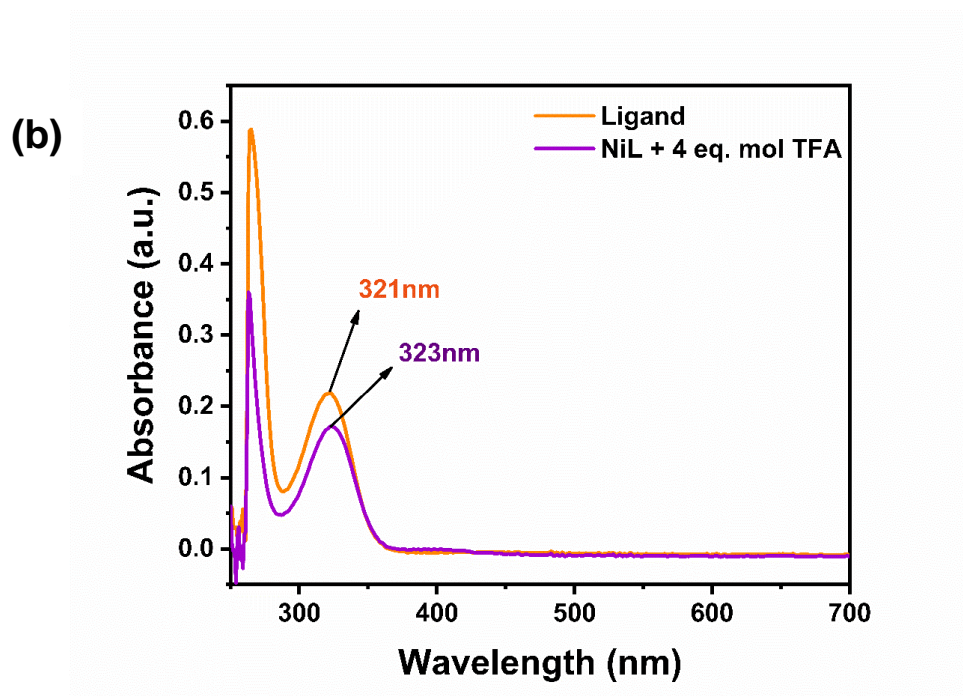

**Fig. S4** The discoloration of the **NiL** following the increase of equivalent moles of TFA **(a)** and the UV-Vis spectrum of **NiL** with 4.0 eq. moles of TFA in comparison with pre-ligand

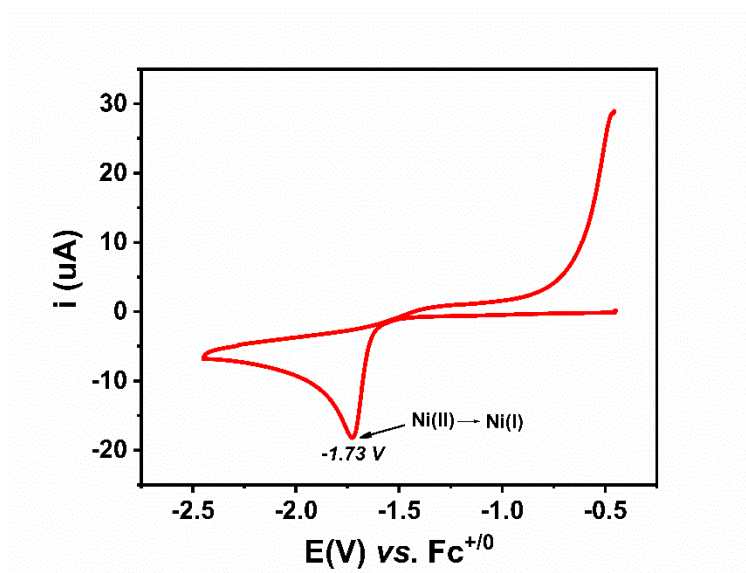

**Fig. S5** Cyclic voltammograms of **NiCl<sub>2</sub> precursor** at a stationary glassy carbon electrode in DMF solutions with scan rate of 50 mV.s<sup>-1</sup>

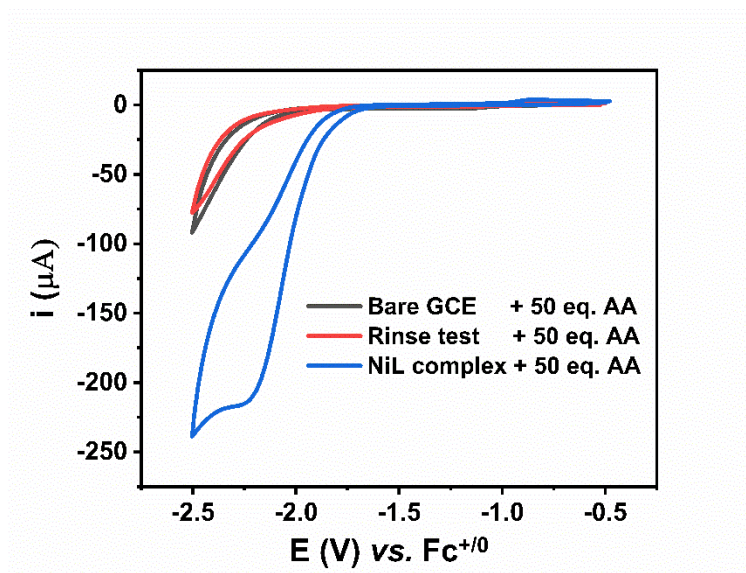

**Fig. S6** “Rinse test” control experiments of **NiL** complex: The glassy carbon electrode, after participating the proton reduction in the presence of catalysts with 50 eq. moles of AA (blue line), was cleaned by DMF solvent washing and used as the working electrode in the proton reduction without catalysts (red line). The bare glassy carbon electrode was used as the reference in the same condition: 50 eq. moles of AA and no catalyst (scan rate at 50 mV.s<sup>-1</sup>)

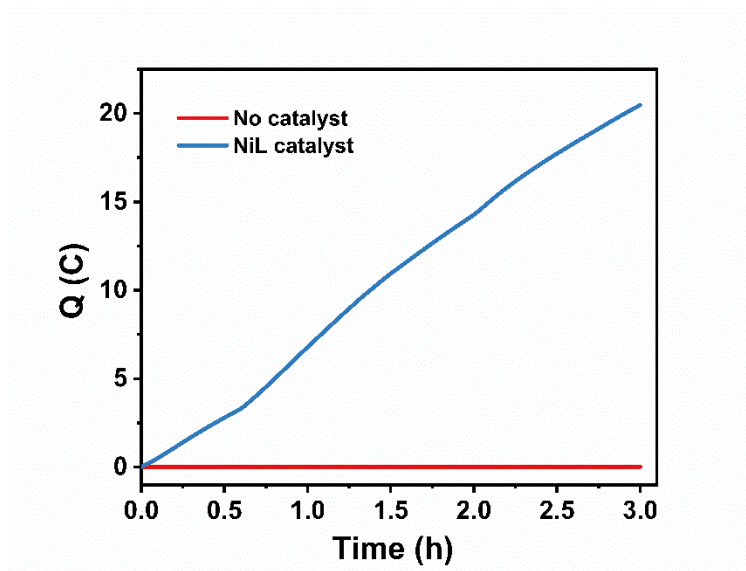

**Fig. S7** Coulometry for bulk electrolysis at -2.05 V vs.  $\text{Fc}^{+/0}$ . The electrolytic solution contains 0.1 M TBATBF in DMF, 50 eq. Moles of Acetic acid: without catalysts (red line) or 1 mM of **NiL** (blue line).

- **Overpotential determination**

Determine the standard potential of Acetic acid in DMF: based on the equation **(1)** <sup>[1]</sup>

$$E^\circ(\text{HA}/\text{A}^-; \text{H}_2) = E^\circ(\text{H}^+/\text{H}_2) - 2.303(\text{RT}/\text{F})\text{p}K_{\text{a}(\text{HA})} + \varepsilon_{\text{D}} - (\text{RT}/2\text{F})\ln(\text{C}_0/\text{C}^{\circ}_{\text{H}_2}) \quad \textbf{(1)}$$

$$E^\circ(\text{H}^+/\text{H}_2) = -0.662 \text{ V (vs } \text{Fc}^{+/0}) \quad [2]$$

$\text{p}K_{\text{a}}$  of Acetic acid in DMF: 13.5

$$\varepsilon_{\text{D}} = 0.04 \text{ V}$$

$\text{C}_0$ : concentration of acetic acid (50 mM)

$\text{C}^{\circ}_{\text{H}_2}$ : concentration of dissolved hydrogen at standard condition = 1.9 mM.

$$\text{R} = 8.314 \text{ J.mol}^{-1}.\text{K}^{-1}; \text{T} = 299\text{K}; \text{F} = 96485$$

$$E^\circ(\text{HA}/\text{A}^-; \text{H}_2) = E^{\text{T}}_{1/2} = (-0.662) - [(2.303 \times 8.314 \times 299)/96485] \times 13.5 + 0.04 - [(8.314 \times 299)/(2 \times 96485)] \ln(50/1.9) = -1.46 \text{ V (vs. } \text{Fc}^{+/0})$$

$$\text{Overpotential} = E^{\text{T}}_{1/2} - E_{\text{cat}/2} = -1.46 - (-2.05) = 0.59 \text{ V (vs. } \text{Fc}^{+/0})$$

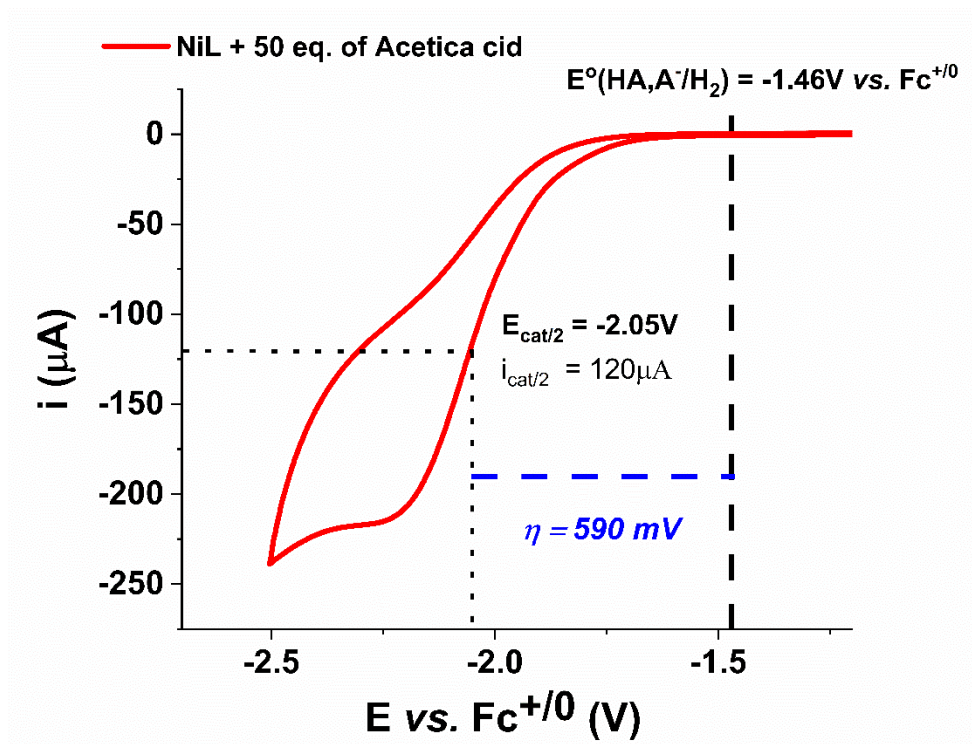

**Fig. S8** Determination of  $i_{\text{cat}/2}$ ;  $E_{\text{cat}/2}$  and overpotential of complexes **NiL**

- **Diffusion coefficient**

Randle-Sevcik equation (**Equation 2**)

$$i_p = 0.4463nFAC \sqrt{nFvRTD} \quad (2)$$

$i_p$ : cathodic peak current (A)

$v$ : scan rate (V/s)

$n$ : number of transferred electrons in redox event

$R$ : Gas constant 8.314 J/mol.K

$F$ : Faraday constant 96485 (C/mol)

$T$ : Temperature 299K

$A$ : electrode surface area 0.071 (cm<sup>2</sup>)

$D$ : diffusion coefficient (cm<sup>2</sup>/s)

$C$ : concentration of catalyst 1mM

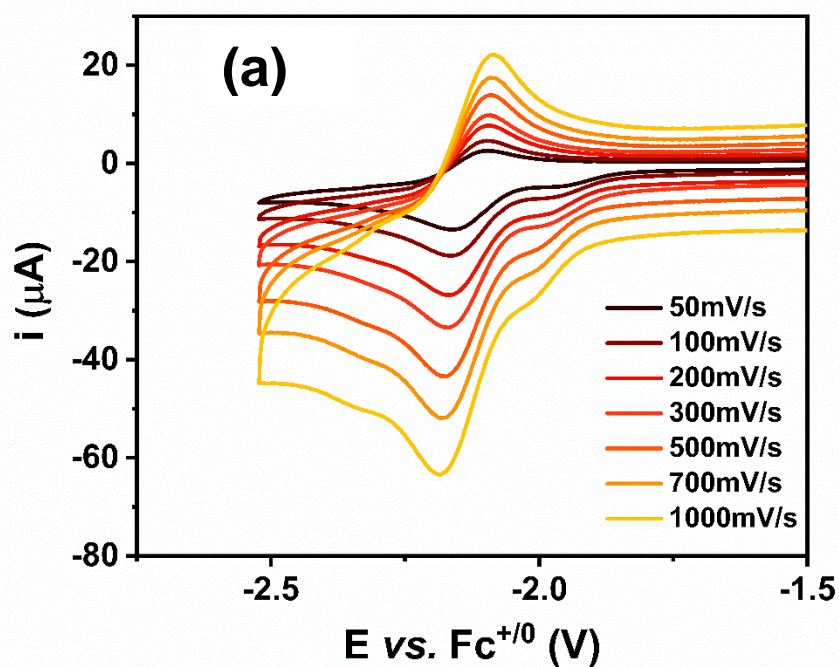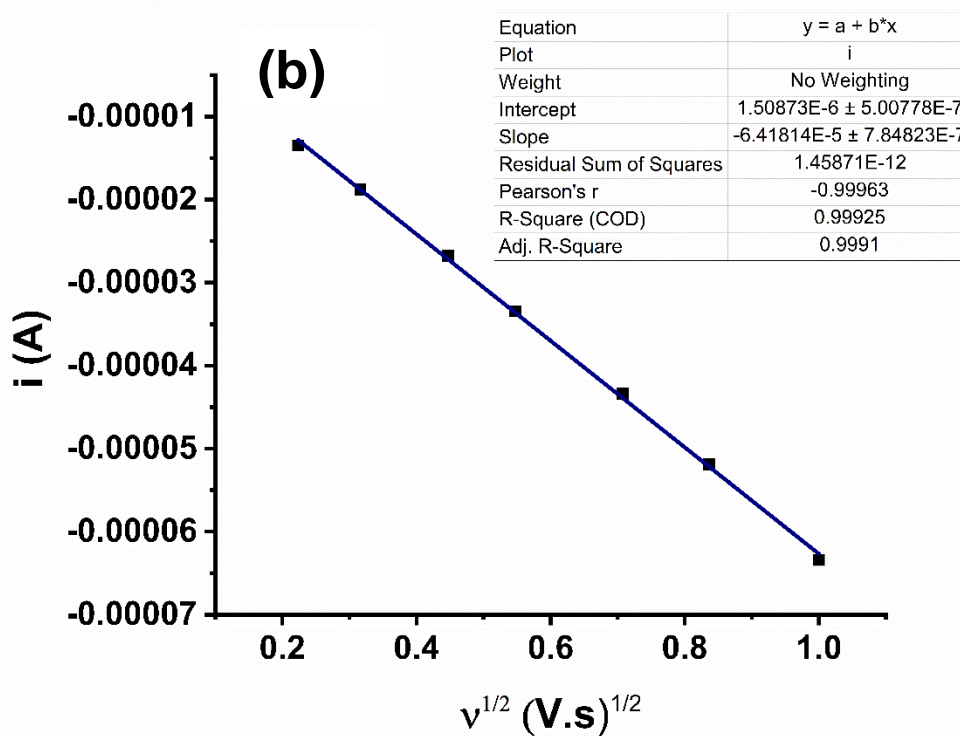

**Fig. S9** Cyclic voltammograms of complex **NiL** (a) and the plots of  $i_p$  versus the square root of scan rate of complex **NiL** (b).

- **Rate constant calculation**

$$\frac{i_{cat}}{i_p} = \frac{n}{0.4463} \times \sqrt{\frac{RTk_{obs}}{Fv}}$$

$i_p$ : cathodic peak current (mA)

$v$ : scan rate 0.05 V/s

$i_c$ : catalytic current (mA)

$n$ : number of transferred electrons (2)

$R$ : Gas constant 8.314 J/mol.K

$F$ : Faraday constant 96485 (C/mol)

$T$ : Temperature 299K

**Table S1** The values of rate constants extracted from PCA with various concentration of acetic acid

| [AcOH] (M) | $i_c$ (mA) | $i_c/i_p$<br>(with $i_p = 11$ mA) | $k_{obs} = 1.93 \cdot 0.05 \cdot (i_c/i_p)^2$<br>( $s^{-1}$ ) | $k_{cat} = k_{obs} / [AcOH]^2$<br>( $M^{-2} \cdot s^{-1}$ ) |
|------------|------------|-----------------------------------|---------------------------------------------------------------|-------------------------------------------------------------|
| 0.01       | 79         | 7.09                              | 4.85                                                          | 48521.16                                                    |
| 0.02       | 112        | 10.18                             | 10.004                                                        | 25010.25                                                    |
| 0.03       | 156        | 14.18                             | 19.41                                                         | 21564.96                                                    |
| 0.04       | 198        | 18.00                             | 31.27                                                         | 19541.25                                                    |
| 0.05       | 238        | 21.64                             | 45.17                                                         | 18069.90                                                    |
| 0.06       | 281        | 25.55                             | 62.97                                                         | 17492.51                                                    |
| 0.07       | 321        | 29.18                             | 82.18                                                         | 16770.88                                                    |
| 0.1        | 401        | 36.46                             | 128.24                                                        | 12824.23                                                    |
| 0.12       | 486        | 44.18                             | 188.37                                                        | 13081.33                                                    |
| 0.15       | 598        | 54.36                             | 285.20                                                        | 12675.40                                                    |

## References

- [1] V. Fourmond, P.-A. Jacques, M. Fontecave, V. Artero, *Inorganic Chemistry* **2010**, 49, 10338-10347.
- [2] M. L. Pegis, J. A. S. Roberts, D. J. Wasylenko, E. A. Mader, A. M. Appel, J. M. Mayer, *Inorganic Chemistry* **2015**, 54, 11883-11888.
